# Supplementary material for: Rapid Detection of Volatile Organic Metabolites in Urine by High-Pressure Photoionization Mass Spectrometry for Breast Cancer Screening: A Pilot Study
Source: MDPI journal article supplement (doi:10.3390/metabo13070870), 2023-07-21
Supplement: s1 [file s1]

# **Rapid Detection of Volatile Organic Metabolites in Urine by High-pressure Photoionization Mass Spectrometry for Breast Cancer Screening: A Pilot Study**

Ming Yang <sup>1,2,3</sup>, Jichun Jiang <sup>2,3</sup>, Lei Hua <sup>2,3</sup>, Dandan Jiang <sup>2,3</sup>, Yadong Wang <sup>4</sup>, Depeng Li <sup>1</sup>, Ruoyu Wang <sup>4</sup>, Xiaohui Zhang <sup>1,\*</sup>, and Haiyang Li <sup>2,3,\*</sup>

1 Key Laboratory of Separation Science for Analytical Chemistry, Dalian Institute of Chemical Physics, Chinese Academy of Sciences, Dalian 116023, China; yangm@dicp.ac.cn (M.Y.); jjc@dicp.ac.cn (J-C.J.); lhua@dicp.ac.cn (L.H.); jiangdandan@dicp.ac.cn (D-D.J.)

2 College of Environment and Chemical Engineering, Dalian University, Dalian 116000, China; lidepeng@dlu.edu.cn(D-P.L.)

3 Center for Advanced Mass Spectrometry, Dalian Institute of Chemical Physics, Chinese Academy of Sciences, Dalian 116023, China;

4 Department of Oncology Medicine, Affiliated Zhongshan Hospital of Dalian University, Dalian 116023, China; 2664126@163.comwangyadong@dlu.edu.cn (Y-D.W.); wangruoyu1963@163.com (R-Y.W.)

\* Correspondence: zhangxiaohui@dlu.edu.cn (X-H.Z.); hli@dicp.ac.cn (H.-Y.L.)

### S1 RF-only quadrupole TOFMS

The home-built time-of-flight mass spectrometer (TOFMS) shown in Figure S1 consisted of a high-pressure photoionization source, an ion transmission system, and an orthogonal acceleration TOF (oaTOF) mass analyzer. Gas-phase analytes were directly introduced into the ion source through a 250  $\mu\text{m}$  i.d., 50 cm long stainless steel capillary with a sampling flow rate of about 30 mL/min. The ion source was pumped by a 3.3 L/s rotary pump (Edwards Ltd., U.K.), which was also used as the fore pump of a three-stage split-flow turbo molecular pump in the MS instrument. The ion source pressure was adjustable in the range of 10-1000 Pa with a vacuum ball valve, which was fixed between the rotary vane pump and the ion source chamber. The ion transmission system, composed of a radio frequency (RF) -only quadrupole, a Skimmer 2 electrode and a rectangular einzel lens, was designed for efficient ion transmission from the ion source at hPa into the oaTOF mass analyzer at a high vacuum of  $10^{-5}$  Pa. The RF-only quadrupole was constructed of four 12 mm o.d., 130 mm long stainless-steel rods in parallel, which was driven by a home-made RF power supply with the optimized RF frequency at 2 MHz and  $V_{p-p}$  at 300 V. The einzel lens, separated from the RF-only quadrupole by the Skimmer-2 electrode with a 1.5 mm i.d. orifice, was employed to further focus and shape the ion beam. The ion beam was then guided through a  $1 \times 10$  mm slit into the extraction region of the oaTOF analyzer. The RF-only quadrupole region, electrostatic field region and the mass analyzer regions were differentially pumped by the three-stage split-flow turbo molecular pump (Leybold Vacuum GmbH TW 250/200/40) with 40 L/s, 200 L/s and 250 L/s, respectively. The oaTOF mass analyzer used in this instrument was a reflection TOFMS in V-mode. A 33 mm chevron MCP detector with a 50  $\Omega$  conical anode was used to collect the ions, and signals were recorded using a 100-ps time-to-digital converter (TDC) (model 9353, Ametek Inc., Oak Ridge, U.S.A) at a repetition rate of 25 kHz. A mass resolving power of about 5000 (FWHM) was achieved with a 0.5 m field-free drift tube.

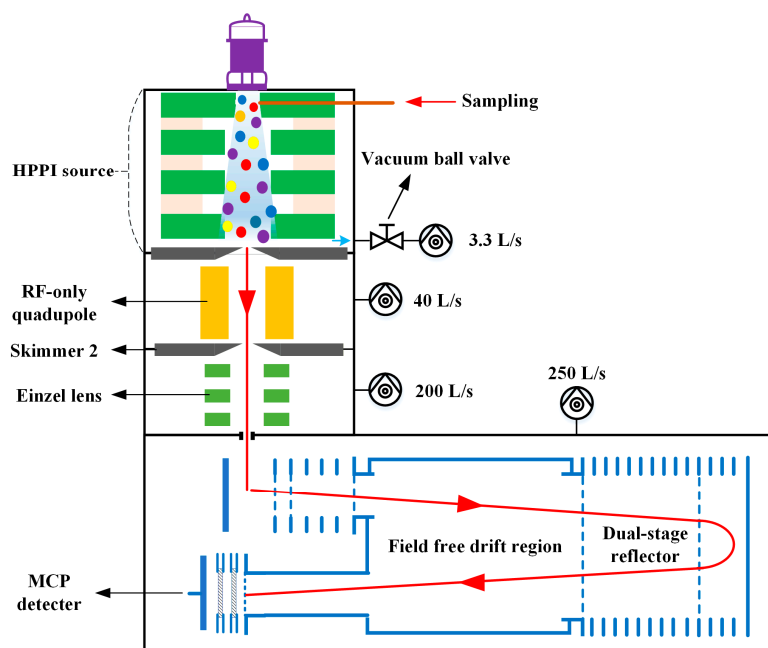

**Figure S1** Schematic diagram of the HPPI-TOFMS.

## S2 Evaluation of the stability of the experimental method

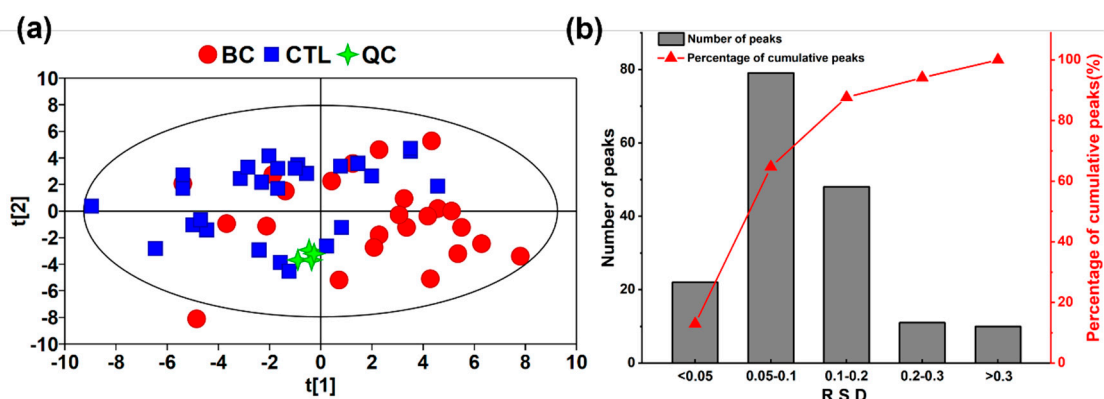

**Figure S2** (a) Principal component analysis (PCA) score plot; (b) RSD distribution for ion features in QC samples.

## S3 The result of receiver operating characteristic curve for individual metabolites

**Table S1** The result of ROC analysis for individual metabolites

| Possible VOMs        | Characteristic peaks       | AUC   | Sensitivity | Specificity |
|----------------------|----------------------------|-------|-------------|-------------|
| acrolein             | $C_3H_4O \cdot H^+$        | 0.844 | 0.8         | 0.7         |
| 2-butanone           | $C_4H_8O \cdot H^+$        | 0.821 | 0.8         | 0.8         |
|                      | $C_4H_8O \cdot H_3O^+$     | 0.757 | 0.6         | 1           |
| 2-pentanone          | $C_5H_{10}O \cdot H^+$     | 0.724 | 0.7         | 0.7         |
|                      | $(C_5H_{10}O)_2 \cdot H^+$ | 0.799 | 0.8         | 0.7         |
| methyl allyl sulfide | $C_4H_8S^+$                | 0.763 | 0.7         | 0.7         |
| 3-methylpyridine     | $C_6H_7N^+$                | 0.733 | 0.6         | 0.7         |
| 2-hexanone           | $C_6H_{12}O \cdot H^+$     | 0.776 | 0.8         | 0.8         |
| 2-methoxythiophene   | $C_5H_6OS^+$               | 0.637 | 0.7         | 0.6         |
| 2-pentylfuran        | $C_9H_{14}O \cdot H^+$     | 0.847 | 0.8         | 0.8         |
| octanoic acid        | $C_8H_{16}O_2 \cdot H^+$   | 0.708 | 0.6         | 0.9         |
